# Supplementary material for: Bead-Free Electrospun Nanofibrous Scaffold Made of PVOH/Keratin/Chitosan Using a Box–Behnken Experimental Design and In Vitro Studies
Source: MDPI journal article supplement (doi:10.3390/polysaccharides5020009), 2024-05-01
Supplement: s1 [file s1]

**Table S1. Estimated coefficients of the fitted quadratic polynomial equation for the response of mean fibre diameter; X<sub>1</sub>: biopolymer (%), X<sub>2</sub>: voltage (kV), X<sub>3</sub>: flow rate (mL/h), and X<sub>4</sub>: spinning distance (mm); (R<sup>2</sup> = 98.58%, Adjusted-R<sup>2</sup> = 97.15%)**

| Source      | Coefficients | T value | DF | Mean Square | F value | P Value | Sig. |
|-------------|--------------|---------|----|-------------|---------|---------|------|
| Model       |              |         | 14 | 5.19        | 68.11   | 0.000   | 0.05 |
| Constant    | 13.41        | 108.66  |    |             |         | 0.000   | 0.05 |
| $X_1$       | -2.22        | -27.84  | 1  | 59.01       | 775.17  | 0.000   | 0.05 |
| $X_2$       | -0.48        | -6.04   | 1  | 2.78        | 36.52   | 0.000   | 0.05 |
| $X_3$       | 0.28         | 3.56    | 1  | 0.97        | 12.69   | 0.003   | 0.05 |
| $X_4$       | -2.2         | -2.75   | 1  | 0.58        | 7.58    | 0.016   | 0.05 |
| $X_1^2$     | -0.62        | -5.67   | 1  | 2.45        | 32.18   | 0.000   | 0.05 |
| $X_2^2$     | -0.43        | -3.99   | 1  | 1.21        | 15.89   | 0.001   | 0.05 |
| $X_3^2$     | -1.07        | -9.88   | 1  | 7.44        | 97.69   | 0.000   | 0.05 |
| $X_4^2$     | -0.31        | -2.89   | 1  | 0.64        | 8.35    | 0.012   | 0.05 |
| $X_1X_2$    | -0.02        | -0.16   | 1  | 0.00        | 0.02    | 0.877   | NS   |
| $X_1X_3$    | 0.04         | 0.28    | 1  | 0.01        | 0.08    | 0.782   | NS   |
| $X_1X_4$    | -0.05        | -0.33   | 1  | 0.01        | 0.11    | 0.746   | NS   |
| $X_2X_3$    | 0.24         | 1.74    | 1  | 0.23        | 3.02    | 0.104   | NS   |
| $X_2X_4$    | 0.14         | 1.03    | 1  | 0.08        | 1.06    | 0.321   | NS   |
| $X_3X_4$    | 0.20         | 1.47    | 1  | 0.16        | 2.15    | 0.164   | NS   |
| Error       |              |         | 14 | 0.08        |         |         |      |
| Lack of fit |              |         | 10 | 0.09        | 1.72    | 0.317   | NS   |
| Pure error  |              |         | 4  | 0.05        |         |         |      |

NS= not significant

**Table S2. Estimated coefficients of the fitted quadratic polynomial equation for the response of mean diameter of fibre defects; X<sub>1</sub>: biopolymer (%), X<sub>2</sub>: voltage (kV), X<sub>3</sub>: flow rate (mL/h), and X<sub>4</sub>: spinning distance (mm); (R<sup>2</sup> = 99.84%, Adjusted-R<sup>2</sup> = 99.67%)**

| Source      | Coefficients | T value | DF | Mean Square | F value | P Value | Sig. |
|-------------|--------------|---------|----|-------------|---------|---------|------|
| Model       |              |         | 14 | 69.43       | 427.56  | 0.000   | 0.05 |
| Constant    | 9.36         | 51.96   |    |             |         | 0.000   | 0.05 |
| $X_1$       | 7.64         | 65.65   | 1  | 699.77      | 4309.36 | 0.000   | 0.05 |
| $X_2$       | -0.44        | -3.74   | 1  | 2.27        | 13.97   | 0.002   | 0.05 |
| $X_3$       | 0.65         | 5.56    | 1  | 5.02        | 30.89   | 0.000   | 0.05 |
| $X_4$       | -0.40        | -3.43   | 1  | 1.92        | 11.79   | 0.004   | 0.05 |
| $X_1^2$     | -0.62        | -3.91   | 1  | 2.49        | 15.31   | 0.002   | 0.05 |
| $X_2^2$     | 3.93         | 24.83   | 1  | 100.14      | 616.68  | 0.000   | 0.05 |
| $X_3^2$     | 4.33         | 27.38   | 1  | 121.74      | 749.67  | 0.000   | 0.05 |
| $X_4^2$     | 3.56         | 22.53   | 1  | 82.41       | 507.50  | 0.000   | 0.05 |
| $X_1X_2$    | -0.06        | -0.31   | 1  | 0.02        | 0.10    | 0.760   | NS   |
| $X_1X_3$    | -0.04        | -0.21   | 1  | 0.01        | 0.04    | 0.837   | NS   |
| $X_1X_4$    | 0.45         | 2.21    | 1  | 0.80        | 4.89    | 0.044   | 0.05 |
| $X_2X_3$    | -0.09        | -0.46   | 1  | 0.035       | 0.21    | 0.652   | NS   |
| $X_2X_4$    | -1.04        | -5.14   | 1  | 4.29        | 26.40   | 0.000   | 0.05 |
| $X_3X_4$    | -0.45        | -2.24   | 1  | 0.81        | 5.00    | 0.042   | 0.05 |
| Error       |              |         | 14 | 0.16        |         |         |      |
| Lack of fit |              |         | 10 | 0.17        | 1.09    | 0.509   | NS   |
| Pure error  |              |         | 4  | 0.15        |         |         |      |

NS= not significant

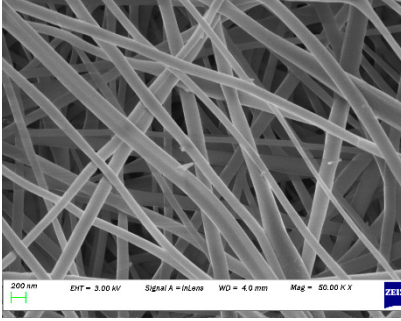

1

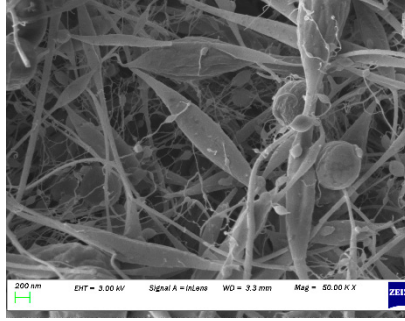

2

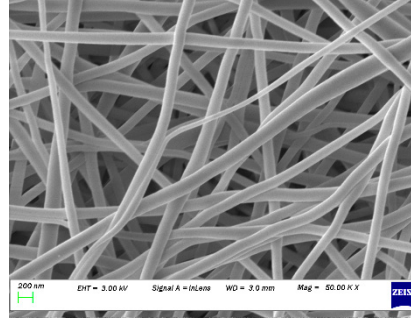

3

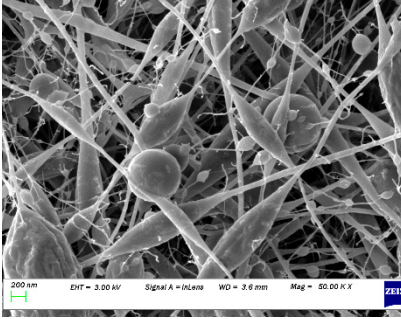

4

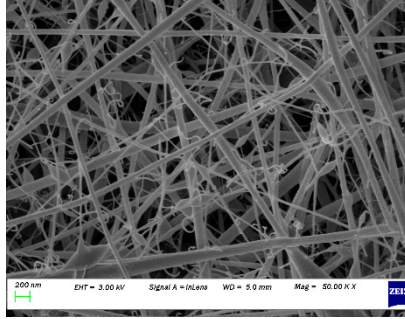

5

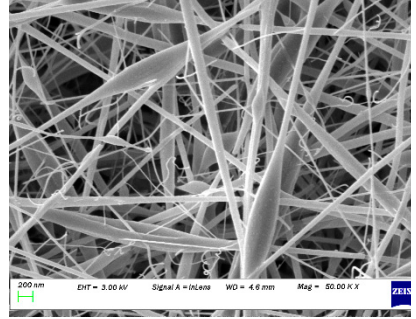

6

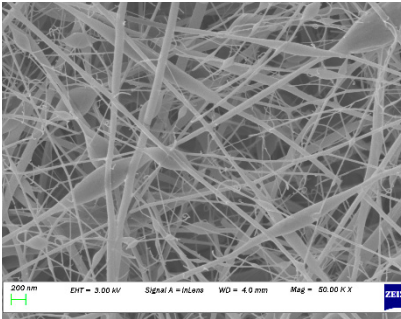

7

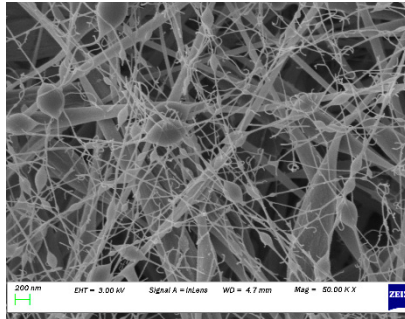

8

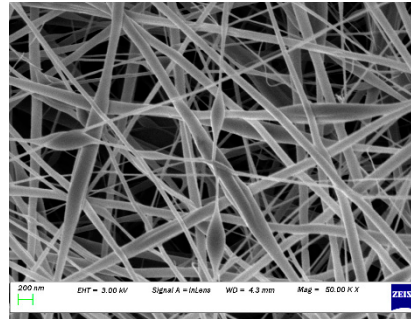

9

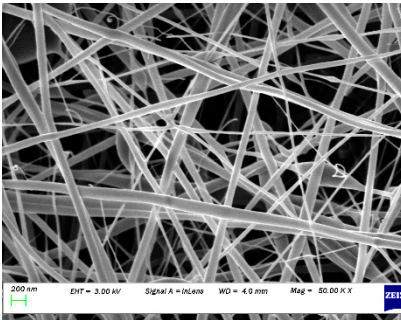

10

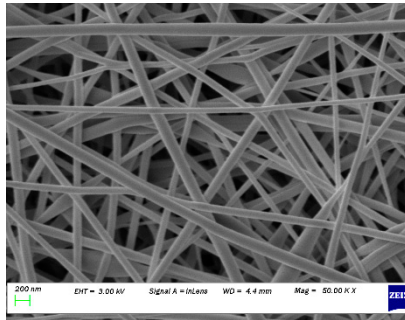

11

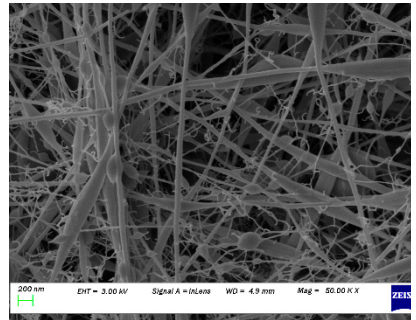

12

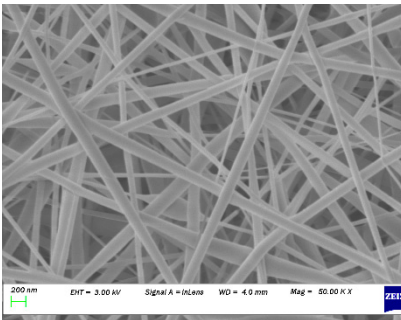

13

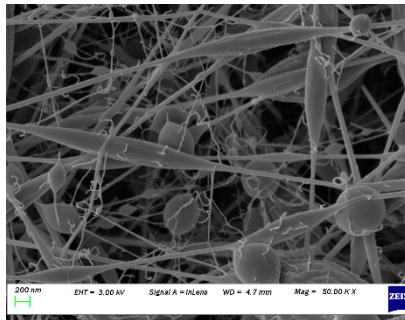

14

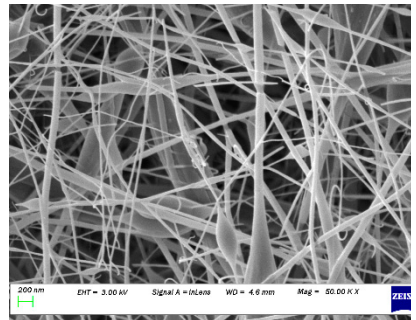

15



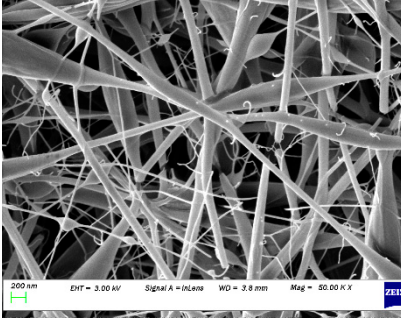

16

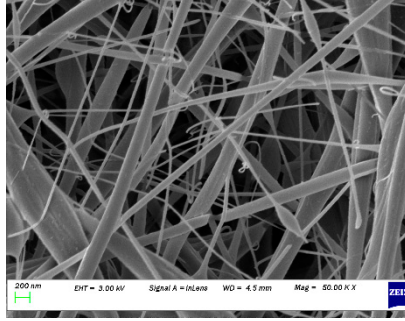

17

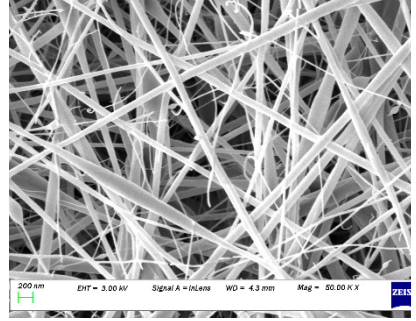

18

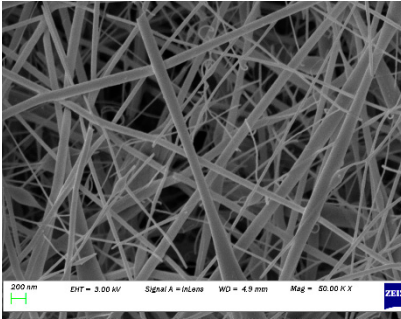

19

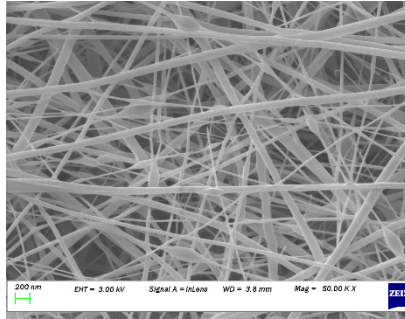

20

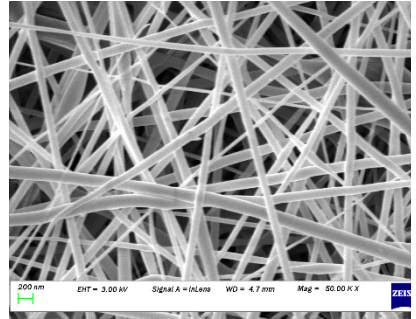

21

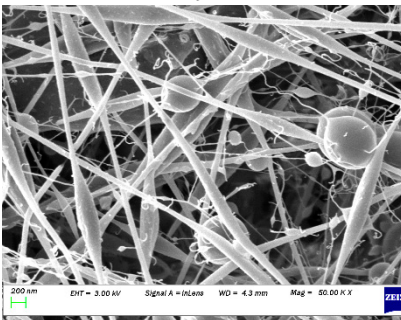

22

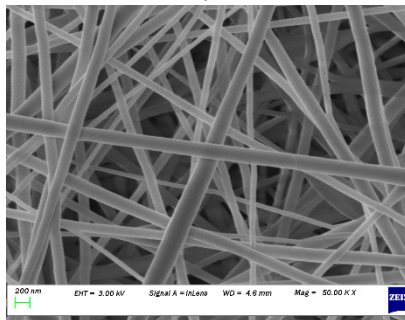

23

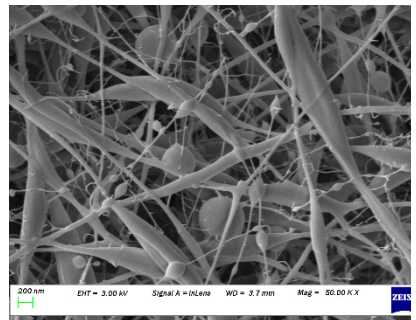

24

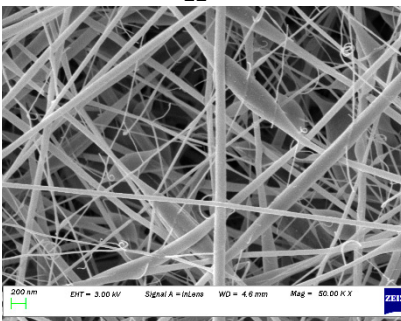

25

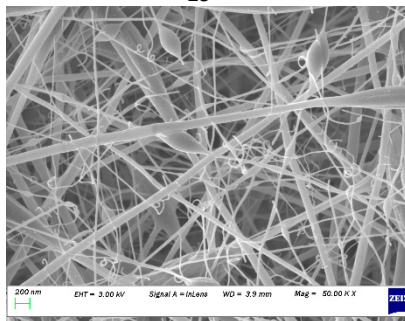

26

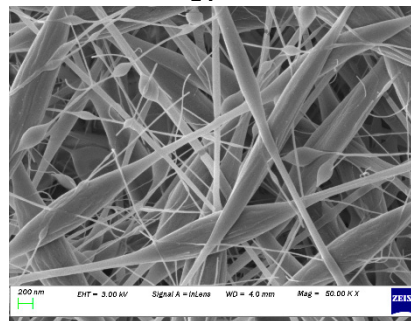

27

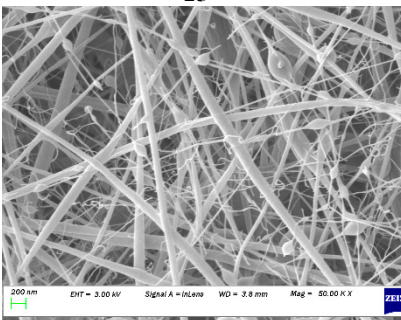

28

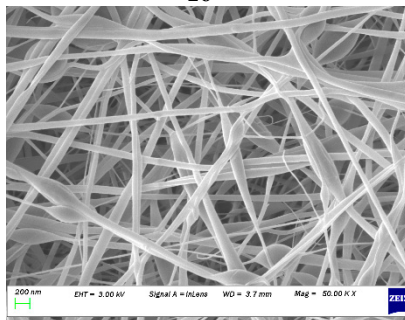

29

**Figure S1. SEM micrographs of the 3DENS**

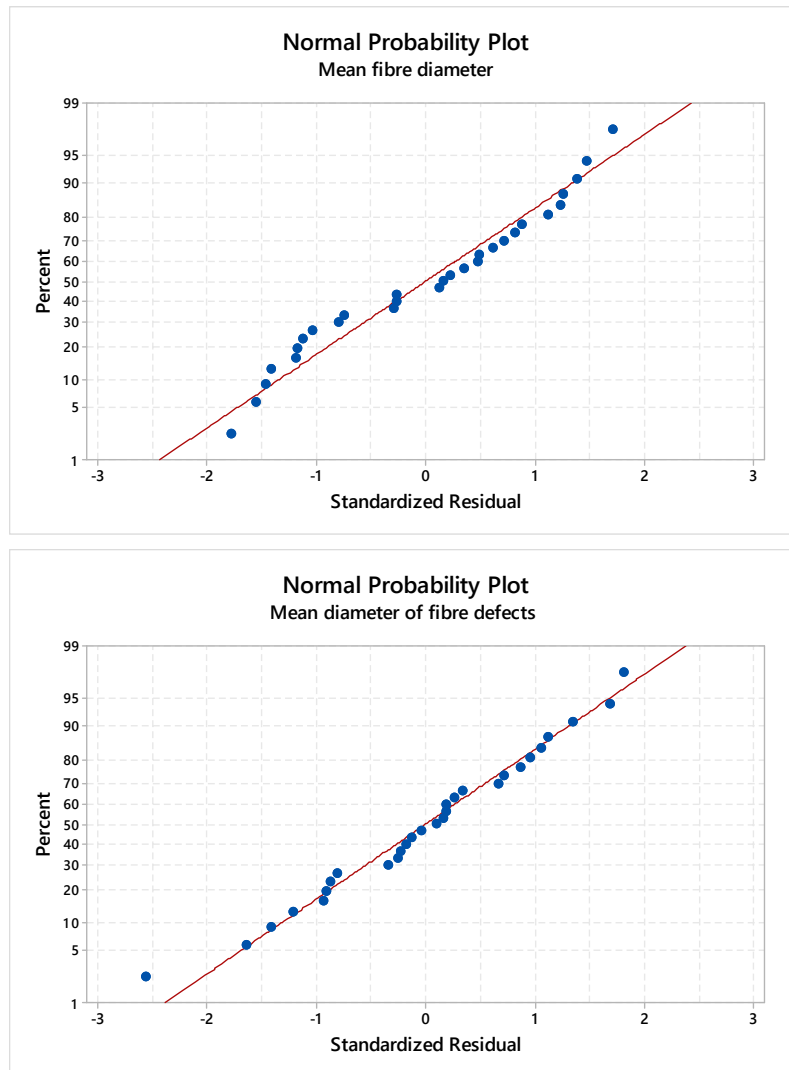

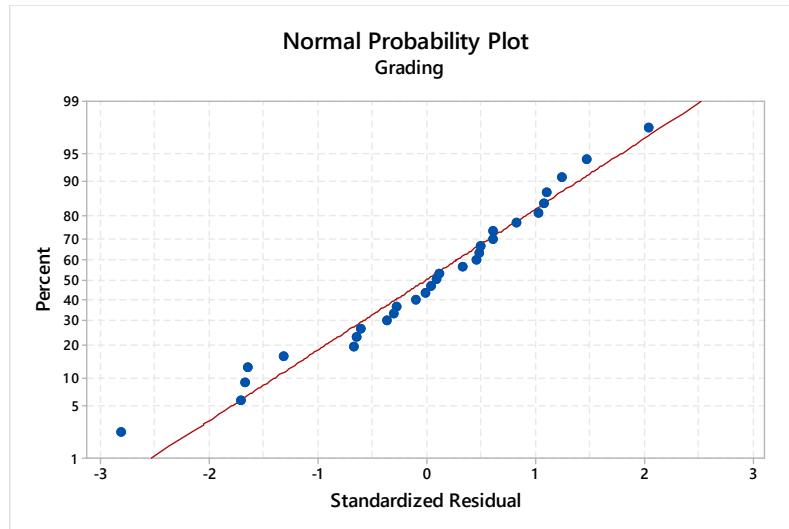

**Figure S2. Normal probability plot for mean fibre and mean diameter of fibre defects**

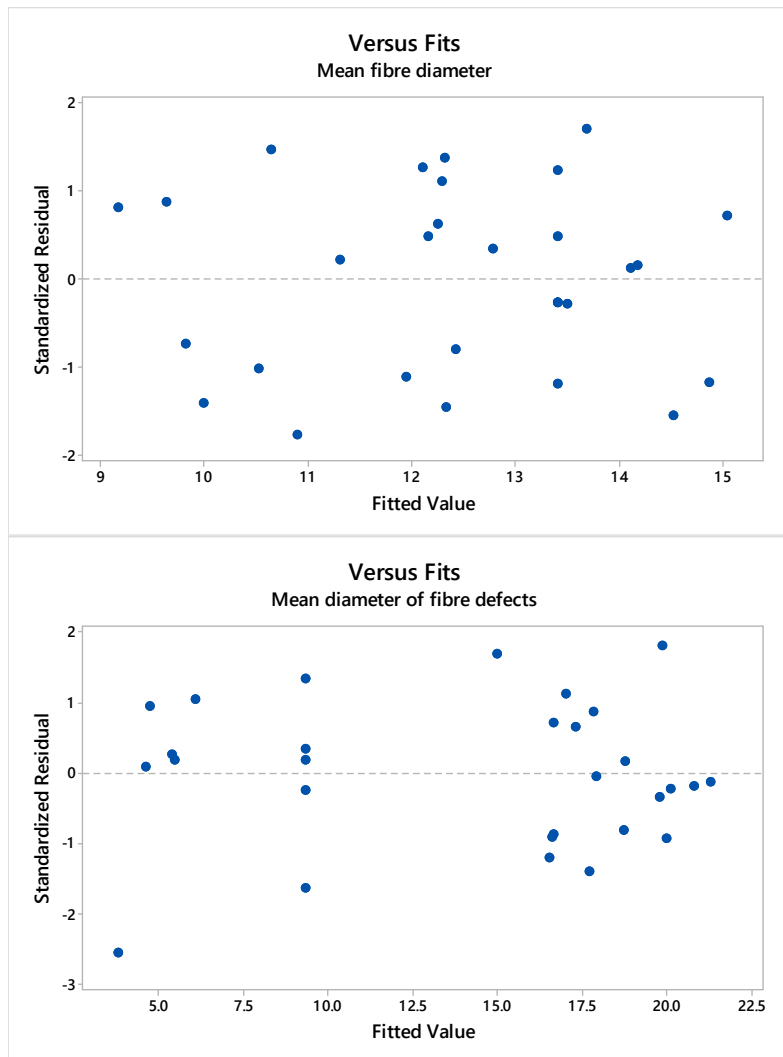

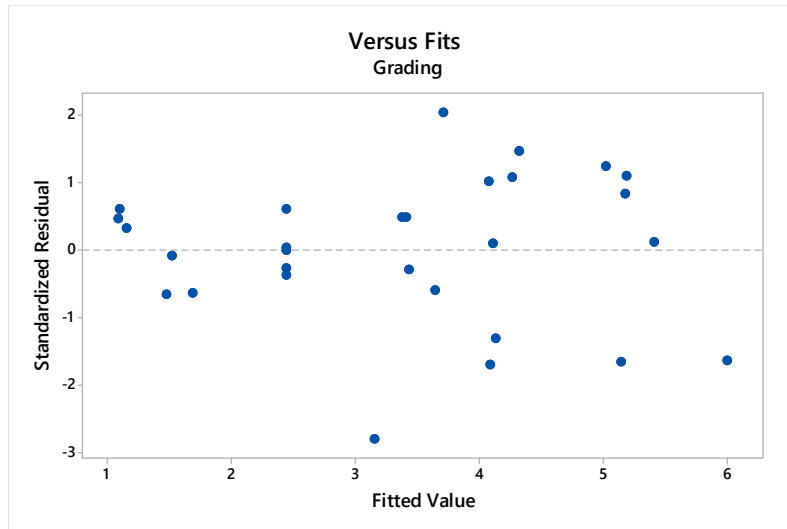

**Figure S3. Residual versus fit plot for mean fibre and mean diameter of fibre defects**

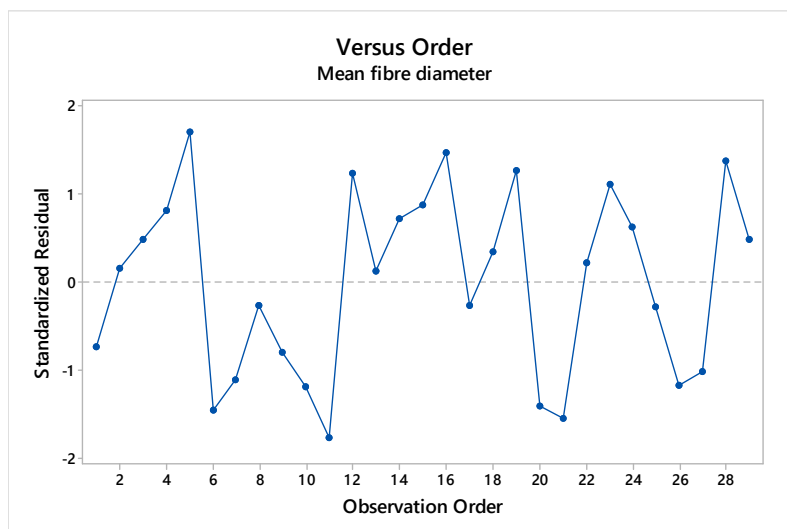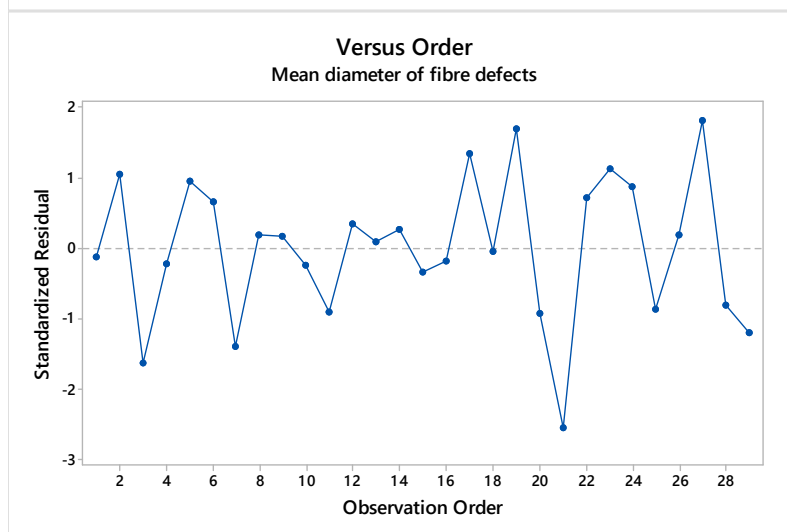

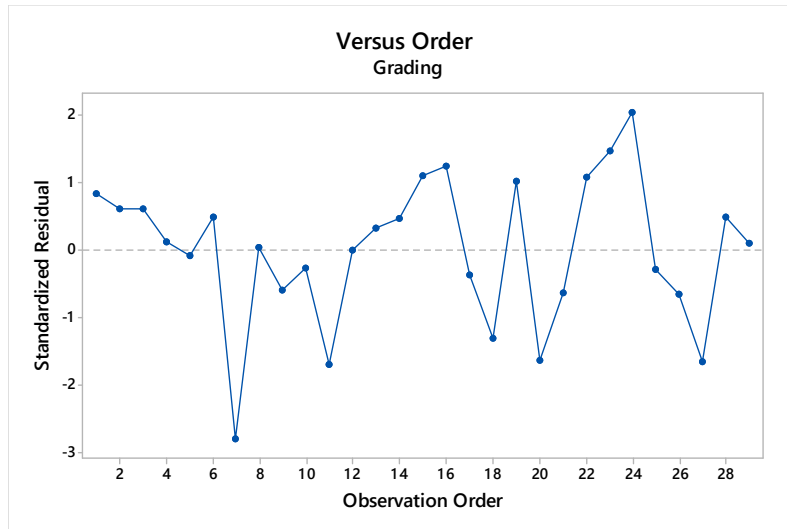

**Figure S4. Residual versus order plot for mean fibre and mean diameter of fibre defects**
